# Supplementary material
Source: HighWire-hosted journal article supplement (https://bmjopenquality.bmj.com/content/8/4/e000454)
Supplement: inline-supplementary-material-1 [file inline-supplementary-material-1.pdf]

Name:

Hospital Number:

Date of Birth:

Patient Addressograph Here

Dear.....

Congratulations on the birth of your baby on.....

Your baby was delivered by caesarean section because:

- There were no complications with the operation**
- There were some complications:**

Some mothers are worried that having a caesarean section means that they will be unable to give birth naturally in the future. This is often not the case. 3 out of 4 women who plan a vaginal birth in their next pregnancy will have a vaginal birth.

After your caesarean section today, we think that:

- It is safe to try for a vaginal delivery in future pregnancies.**
- We would advise delivery by caesarean section**

**in future because:****Other advice for future includes:**

In your next pregnancy, you will be seen by a specialist doctor as well as your midwife who will discuss your options and any concerns you may have.

You can get further information about birth choices from:

[www.rcog.org.uk](http://www.rcog.org.uk) → patients → patient information leaflets → Birth after previous caesarean section.  
[www.caesarean.org.uk](http://www.caesarean.org.uk)

Signed: .....

Print name: .....

Job title: .....

Date: .....

TOP COPY TO PATIENT

MIDDLE COPY IN NOTES.

BOTTOM COPY TO GP
